# Supplementary material for: Simultaneous implementation of resistive switching and rectifying effects in a metal-organic framework with switched hydrogen bond pathway
Source: PubMed Central journal article supplement — Sci Adv. 2019 Aug 2;5(8):eaaw4515. doi: 10.1126/sciadv.aaw4515 (PMC6677547; doi:10.1126/sciadv.aaw4515), 2019-08-02
Supplement: aaw4515_SM.pdf [file aaw4515_SM.pdf]

## Supplementary Materials for

### Simultaneous implementation of resistive switching and rectifying effects in a metal-organic framework with switched hydrogen bond pathway

Zizhu Yao\*, Liang Pan\*, Lizhen Liu, Jindan Zhang, Quanjie Lin, Yingxiang Ye, Zhangjing Zhang\*, Shengchang Xiang\*, Banglin Chen\*

\*Corresponding author. Email: zzhang@fjnu.edu.cn (Z.Z.); scxiang@fjnu.edu.cn (S.X.); banglin.chen@utsa.edu (B.C.)

Published 2 August 2019, *Sci. Adv.* **5**, eaaw4515 (2019)  
DOI: 10.1126/sciadv.aaw4515

#### This PDF file includes:

Fig. S1. Structure and electrical performance of FJU-23-H<sub>2</sub>O single crystal.

Fig. S2. The microscopic image of the experimental setup.

Fig. S3. Variations of distance (H1w1...O31) and bond angle (O1w-H1w1...O11) under various dc voltages applied on the same one single crystal of FJU-23-H<sub>2</sub>O along the *c* axis.

Fig. S4. Structure and electrical performance of FJU-23-D<sub>2</sub>O single crystal.

Fig. S5. The characterization of FJU-23-H<sub>2</sub>O.

Table S1. Selected bond lengths (Å) and bond angles (°) for O1w.

Table S2. Selected bond lengths (Å) and bond angles (°) for O3w.

Table S3. Performance parameters for some representative RRAMs.

Table S4. Crystal data and structure refinement for FJU-23-H<sub>2</sub>O, FJU-23-D<sub>2</sub>O, and FJU-23-H<sub>2</sub>O under voltage sweeping on one single crystal.

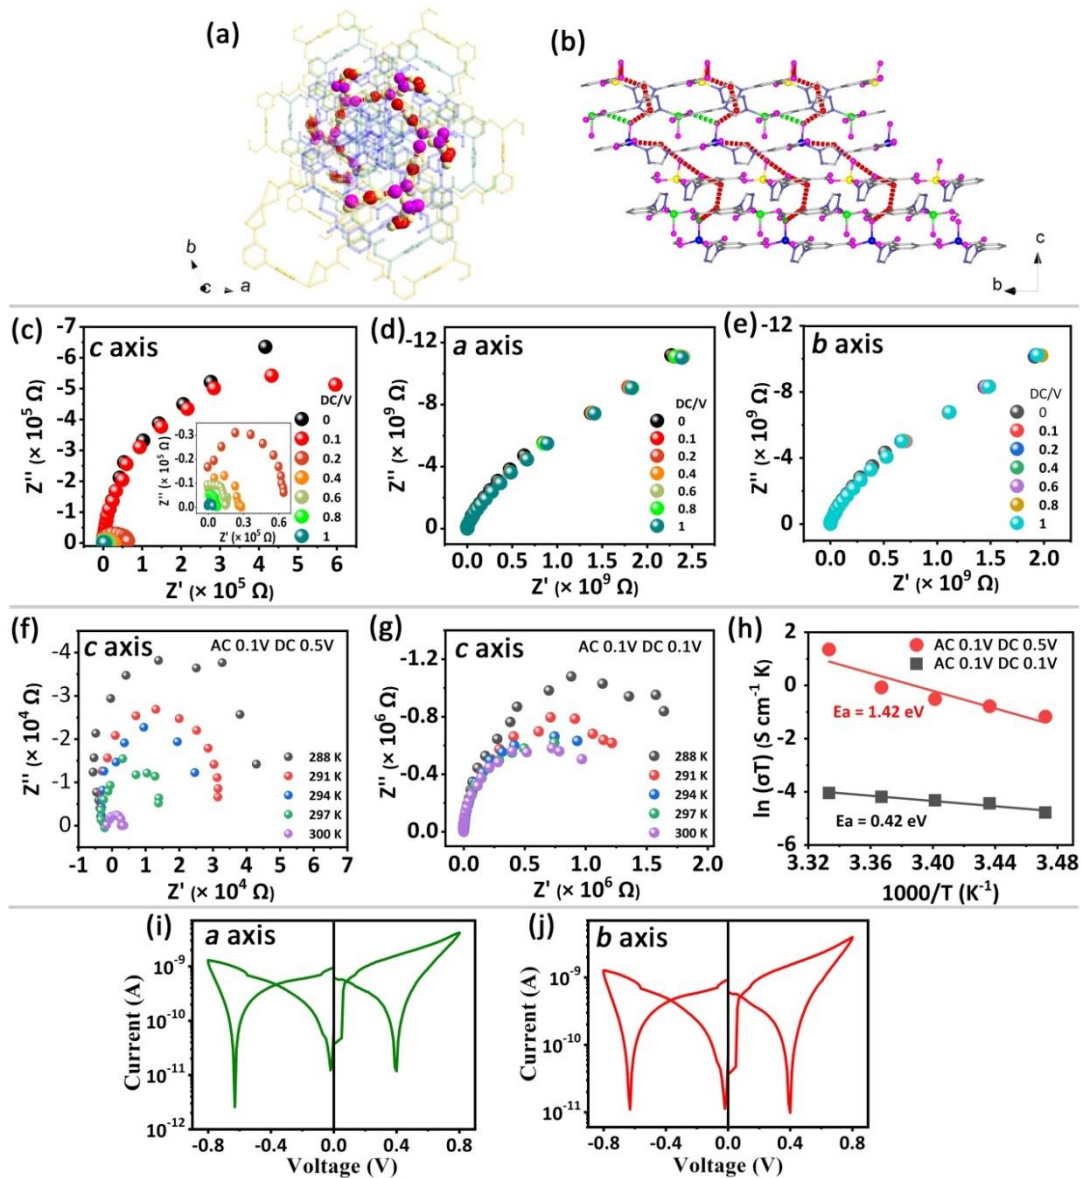

**Fig. S1. Structure and electrical performance of FJU-23-H<sub>2</sub>O single crystal.** (a) The view of one discontinuous hydrogen-bonding chain in FJU-23-H<sub>2</sub>O along the *c* axis. (b) The packing of six single honeycomb sheets. (c) Typical Nyquist plots of FJU-23-H<sub>2</sub>O along the *c* axis under AC voltage of 0.1 V accompanying with various DC voltages. (d & e) Typical Nyquist plots under AC voltage of 1 V accompanying with various DC voltages for FJU-23-H<sub>2</sub>O along the *a* and *b* axis. The temperature dependent of typical Nyquist plots for FJU-23-H<sub>2</sub>O along the *c* axis under (f) AC voltage of 0.1 V, DC voltage of 0.5 V, and (g) AC voltage of 0.1 V, DC voltage of 0.1 V. (h) The Arrhenius plot of FJU-23-H<sub>2</sub>O along the *c* axis. Semilogarithmic plot of the room-temperature current–voltage (*I*–*V*) characteristics of the single crystal FJU-23-H<sub>2</sub>O along the *a* (i) and *b* (j) axes.

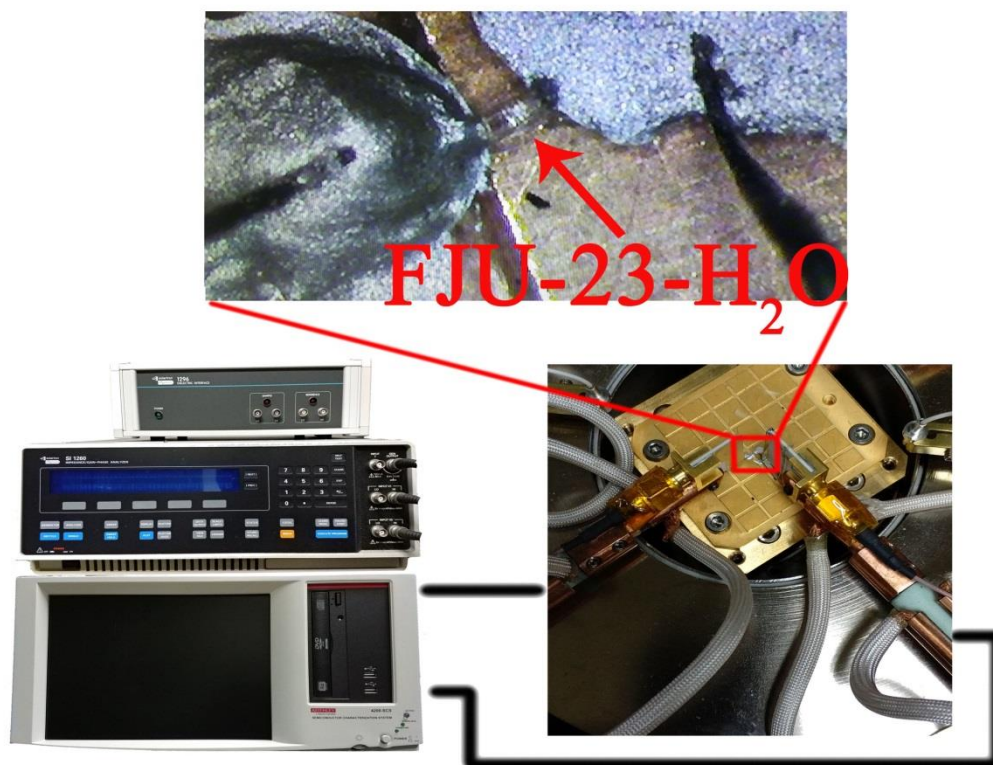

Solartron 1260/1296 (up)  
Keithley 4200 (down)

**Fig. S2.** The microscopic image of the experimental setup. Photo Credit: Zizhu Yao, Fujian Normal University.

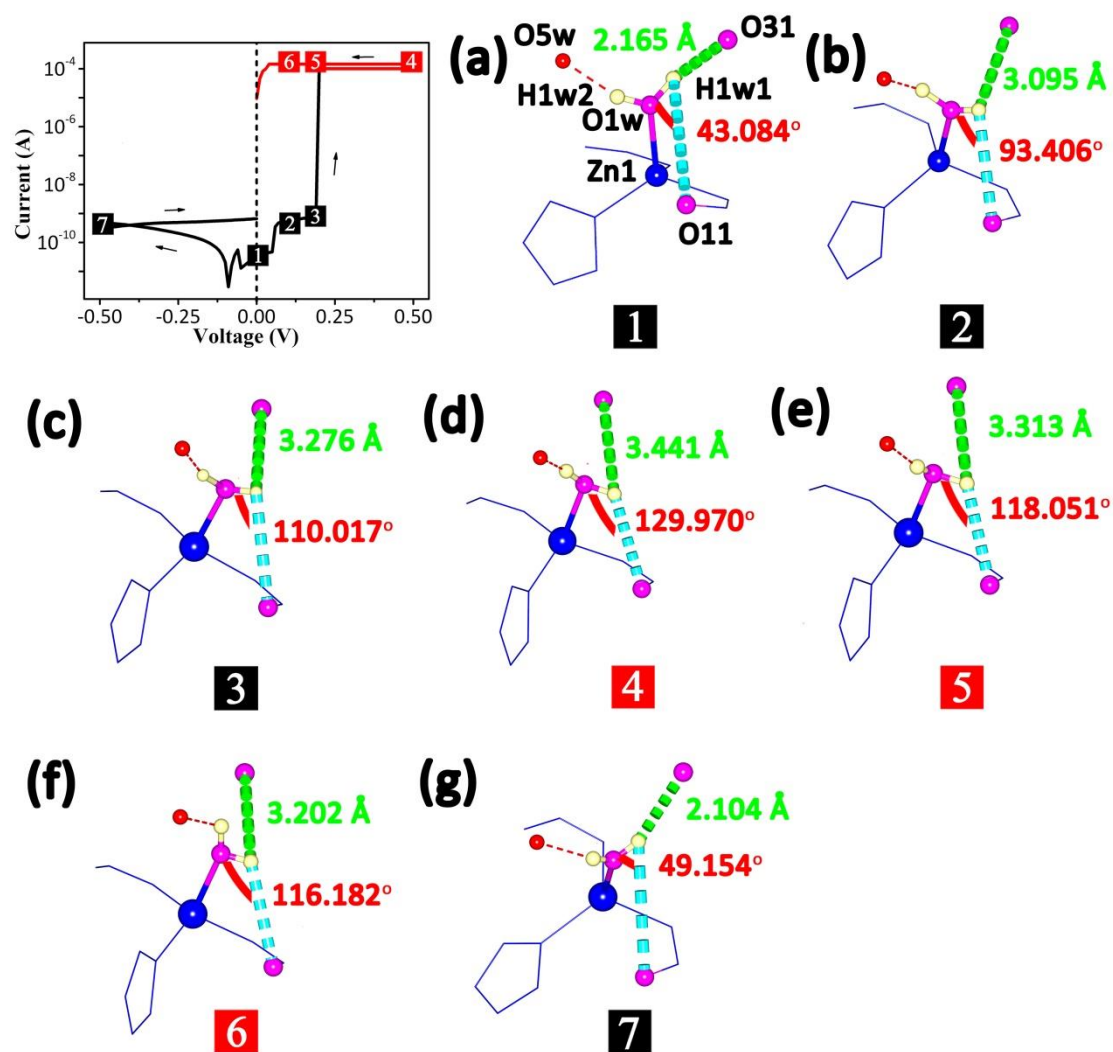

Fig. S3. Variations of distance (H1w1...O31) and bond angle (O1w-H1w1...O11) under various dc voltages applied on the same one single crystal of FJU-23-H<sub>2</sub>O along the *c* axis.

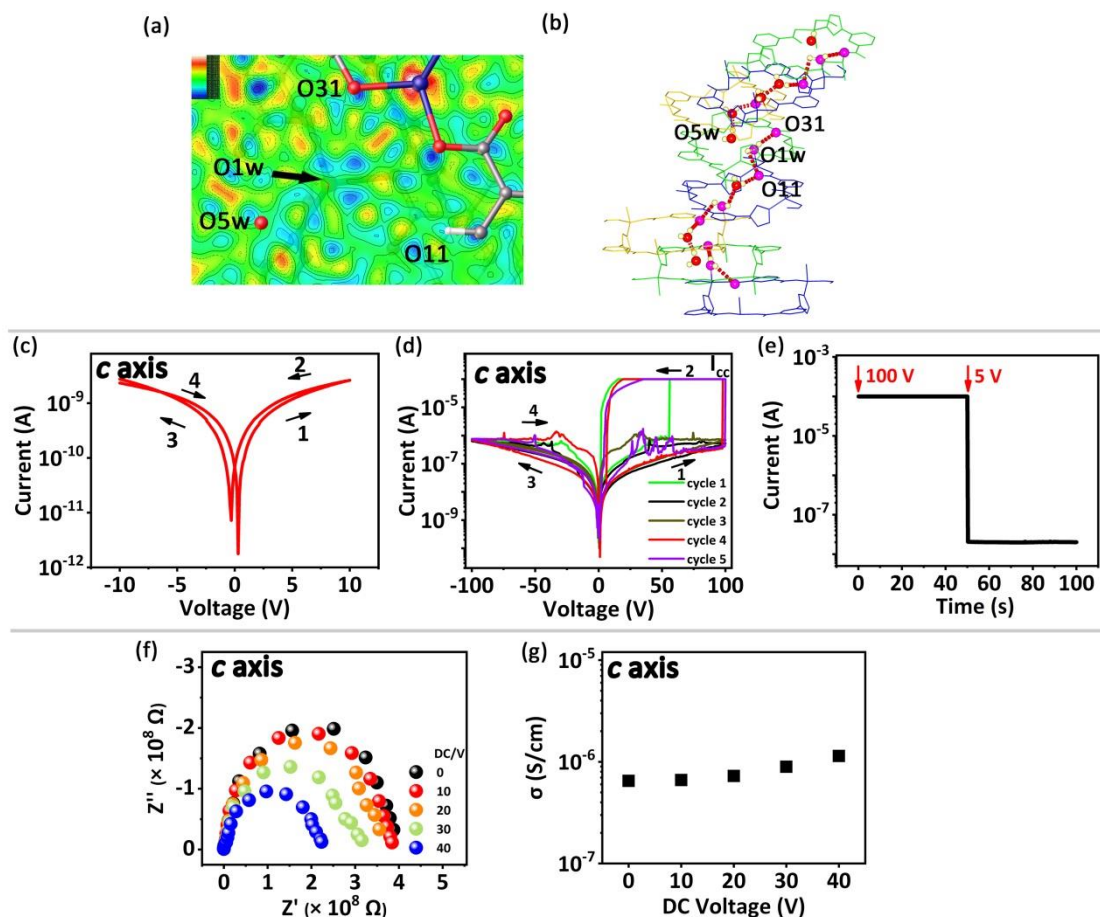

**Fig. S4. Structure and electrical performance of FJU-23-D<sub>2</sub>O single crystal.** (a) The original difference Fourier maps (diff) near O1w before adding D1w1 and D1w2 in FJU-23-D<sub>2</sub>O. (b) hydrogen-bonding chain fragment in FJU-23-D<sub>2</sub>O. Semilogarithmic plots of the room-temperature current-voltage (I-V) characteristics of the FJU-23-D<sub>2</sub>O along the *c* axis within the DC voltage range from -10 to 10 V (c) and -100 to 100 V (d). The arrows indicate the sweeping direction while the numbers represent the sweeping sequence;  $I_{cc}$  stands for the compliance current ( $10^{-4}$  A). The set voltage is 56.5, 97.0 and 99.5 V at cycle 1, 4 and 5, respectively. At cycles 2 and 3, resistive switching behavior has not been observed, which may be attributed to the higher set voltage than 100 V, exceeding the working limit of 100 V for our Keithley 4200 precision semiconductor parameter analyzer. (e) Volatile characteristics of FJU-23-D<sub>2</sub>O. Its low resistance state under the bias of 100 V cannot be retained when the applied DC voltage is quickly switched down to 5 V. (f) Typical Nyquist plots and (g) proton conductivity calculated from AC impedance spectroscopy for FJU-23-D<sub>2</sub>O along the *c* axis under AC voltage of 0.1 V accompanying with various DC voltages ranging from 0 to 40 V.

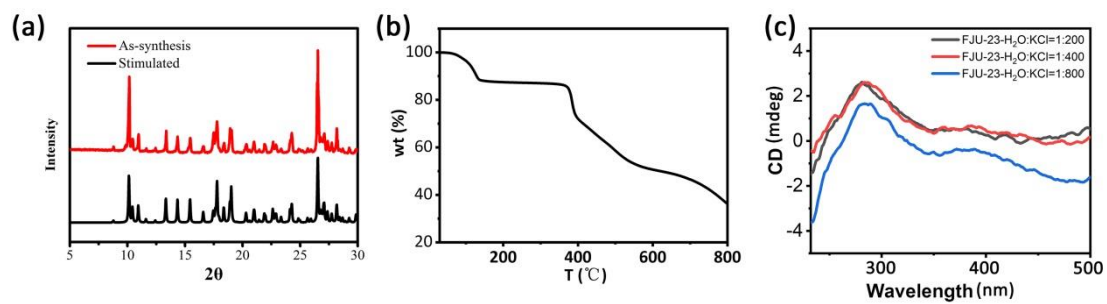

**Fig. S5. The characterization of FJU-23-H<sub>2</sub>O.** (a) PXRD patterns, (b) TGA and (c) Circular dichroism spectra of FJU-23-H<sub>2</sub>O.

**Table S1. Selected bond lengths (Å) and bond angles (°) for O1w.**

| DC voltage/V | Angle(O1w-H1w1-O11)/° | Angle(H1w1-O1w-H1w2)/° | Angle(O1w-H1w1-O31)/° | d(O1w-O11)/Å | d(H1w1-O11)/Å | d(O1w-O31)/Å | d(H1w1-O31)/Å | d(O1w-O5w)/Å | d(O5w-H1w2)/Å |
|--------------|-----------------------|------------------------|-----------------------|--------------|---------------|--------------|---------------|--------------|---------------|
| 0            | 43.084(2)             | 118.710(6)             | 160.546(2)            | 3.189(8)     | 3.826(5)      | 3.102(8)     | 2.168(4)      | 2.570(8)     | 1.708(7)      |
| 0.1          | 93.406(3)             | 107.484(8)             | 82.931(4)             | 3.180(6)     | 3.019(6)      | 3.104(4)     | 3.095(7)      | 2.572(7)     | 1.511(8)      |
| 0.2          | 110.017(3)            | 100.000(8)             | 69.754(6)             | 3.181(7)     | 2.845(6)      | 3.097(6)     | 3.276(9)      | 2.571(6)     | 1.691(7)      |
| 0.5          | 129.970(5)            | 117.037(10)            | 59.891(6)             | 3.192(7)     | 2.549(6)      | 3.092(6)     | 3.441(7)      | 2.571(7)     | 1.654(9)      |
| 0.2          | 118.051(6)            | 115.076(10)            | 66.562(6)             | 3.189(8)     | 2.663(8)      | 3.067(7)     | 3.313(9)      | 2.585(9)     | 1.813(6)      |
| 0.1          | 116.182(3)            | 98.913(7)              | 74.216(4)             | 3.189(8)     | 2.751(4)      | 3.082(11)    | 3.202(5)      | 2.573(13)    | 1.910(18)     |
| -0.5         | 49.154(9)             | 112.378(10)            | 162.628(15)           | 3.172(13)    | 3.691(15)     | 2.982(9)     | 2.104(9)      | 2.618(18)    | 1.803(13)     |



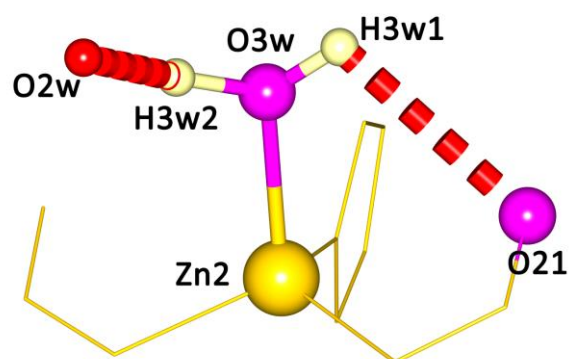

**Table S2. Selected bond lengths (Å) and bond angles (°) for O3w.**

|                         | DC voltage<br>/V | Angle<br>(O3w-H3w1-O21)/° | d(O3w-H3w2)<br>/Å | d(O3w-H3w1)<br>/Å | d(O3w-O21)<br>/Å |
|-------------------------|------------------|---------------------------|-------------------|-------------------|------------------|
| FJU-23-H <sub>2</sub> O | 0                | 103.847(5)                | 1.095(3)          | 0.928(5)          | 3.005(6)         |
| FJU-23-0.1V             | 0.1              | 103.193(5)                | 0.912(5)          | 0.868(6)          | 3.001(5)         |
| FJU-23-0.2V             | 0.2              | 106.267(5)                | 0.862(11)         | 0.898(4)          | 3.004(5)         |
| FJU-23-0.5V             | 0.5              | 105.184(4)                | 0.861(5)          | 0.955(5)          | 3.013(6)         |
| FJU-23-0.2V-R           | 0.2              | 106.392(3)                | 0.822(7)          | 1.041(3)          | 2.999(8)         |
| FJU-23-0.1V-R           | 0.1              | 107.277(5)                | 1.010(9)          | 0.973(14)         | 2.998(10)        |
| FJU-23-(-)0.5V          | -0.5             | 106.814(3)                | 0.974(2)          | 0.926(13)         | 3.025(12)        |



**Table S3. Performance parameters for some representative RRAMs.**

| RRAM                                                                                | conductive carriers      | on/off ratio                     | rectification ratio       | set voltage (V) | Refs.     |
|-------------------------------------------------------------------------------------|--------------------------|----------------------------------|---------------------------|-----------------|-----------|
| Ag/FJU-23-H <sub>2</sub> O/Ag                                                       | H <sup>+</sup>           | 2×10 <sup>5</sup>                | 10 <sup>5</sup> @±0.5 V   | ~0.2            | this work |
| Au/mer-[Ru(2(phenylazo)pyridine) <sub>3</sub> ](PF <sub>6</sub> ) <sub>2</sub> /ITO | Electron                 | ~10 <sup>5</sup>                 | /                         | ~0.4            | 10        |
| Ag/ZIF-8 in MeOH vapor/Ag                                                           | Ag <sup>+</sup>          | ~10 <sup>4</sup>                 | /                         | 1.20-2.40       | 24        |
| Ag/Rb-CD-MOF/Ag                                                                     | OH <sup>-</sup>          | 150                              | /                         | 2               | 25        |
| Ag/RSMOF-1/Ag                                                                       | H <sup>+</sup>           | ~30                              | /                         | 7.5             | 26        |
| rGO/MoS <sub>2</sub> @ZIF-8/rGO                                                     | Electron, hole           | 7.0×10 <sup>4</sup>              | /                         | 3.3             | 29        |
| Au/HKUST-1/Au                                                                       | Cu <sup>2+</sup>         | 18                               | /                         | ~0.78           | 28        |
| Cu/ferrocene@HKUST-1/Au                                                             | /                        | ~10                              | /                         | ~0.6            | 27        |
| Al/Zn-TCPP@PVPy/ITO                                                                 | Electron                 | ~10 <sup>3</sup>                 | /                         | 0.5             | 30        |
| Pt/Ta <sub>2</sub> O <sub>5</sub> /HfO <sub>2</sub> /TiN                            | Electron                 | ~10 <sup>3</sup>                 | 10 <sup>4</sup> @±10 V    | ~5              | 33        |
| Ag/a-Si/p-Si                                                                        | Ag <sup>+</sup>          | 10 <sup>3</sup> -10 <sup>7</sup> | 10 <sup>4</sup> @±3 V     | ~4              | 34        |
| Au/ZrO <sub>2</sub> :Au-nanocrystal/n <sup>+</sup> -Si                              | oxygen vacancy           | ~10 <sup>2</sup>                 | 7×10 <sup>2</sup> @±0.5 V | ~3.1            | 35        |
| Pt/NiO <sub>x</sub> /TiO <sub>x</sub> /Pt                                           | Electron, hole           | ~10 <sup>6</sup>                 | ~10 <sup>5</sup> @±3 V    | ~1.5            | 36        |
| Pt /20 at.% SDC:STO VHN film (nominal thickness: 30nm) /Nb:STO                      | Electron, oxygen vacancy | ~10 <sup>4</sup>                 | /                         | 5               | 37        |
| p-Si/SiO <sub>2</sub> /n-Si                                                         | Si <sup>4+</sup>         | 10 <sup>4</sup>                  | 10 <sup>5</sup> @±4 V     | ~7              | 38        |
| Au/PI:PCBM/Al/native SiO <sub>x</sub> /p-Si                                         | Electron                 | ~10 <sup>2</sup>                 | 10 <sup>4</sup> @±2.3 V   | ~3              | 39        |
| Al/Glucose/p <sup>+</sup> -Si                                                       | oxygen vacancy           | ~10 <sup>3</sup>                 | /                         | ~3.4            | 40        |
| Cu/poly(1,3,5-trivinyl-1,3,5-trimethyl cyclotrisiloxane) (pV3D3)/Al                 | Cu <sup>2+</sup>         | 10 <sup>7</sup>                  | /                         | 5               | 41        |

**Table S4. Crystal data and structure refinement for FJU-23-H<sub>2</sub>O, FJU-23-D<sub>2</sub>O, and FJU-23-H<sub>2</sub>O under voltage sweeping on one single crystal.**

| Compounds                                                    | FJU-23-H <sub>2</sub> O                                                            | FJU-23-H <sub>2</sub> O<br>-293k                                                   | FJU-23-D <sub>2</sub> O<br>-293k                                                                  | FJU-23-D <sub>2</sub> O<br>-150k                                                                  | FJU-23-0.1V                                                                        | FJU-23-0.2V                                                                        | FJU-23-0.5V                                                                        | FJU-23-0.2V-R                                                                      | FJU-23-0.1V-R                                                                      | FJU-23(-)0.5V                                                                      |
|--------------------------------------------------------------|------------------------------------------------------------------------------------|------------------------------------------------------------------------------------|---------------------------------------------------------------------------------------------------|---------------------------------------------------------------------------------------------------|------------------------------------------------------------------------------------|------------------------------------------------------------------------------------|------------------------------------------------------------------------------------|------------------------------------------------------------------------------------|------------------------------------------------------------------------------------|------------------------------------------------------------------------------------|
| Empirical formula                                            | C <sub>30</sub> H <sub>29</sub> N <sub>9</sub> O <sub>19</sub><br>Zn <sub>3</sub>  | C <sub>30</sub> H <sub>29</sub> N <sub>9</sub> O <sub>19</sub><br>Zn <sub>3</sub>  | C <sub>30</sub> H <sub>15</sub> D <sub>14</sub> N <sub>9</sub><br>O <sub>19</sub> Zn <sub>3</sub> | C <sub>30</sub> H <sub>15</sub> D <sub>14</sub> N <sub>9</sub><br>O <sub>19</sub> Zn <sub>3</sub> | C <sub>30</sub> H <sub>29</sub> N <sub>9</sub> O <sub>19</sub><br>Zn <sub>3</sub>  | C <sub>30</sub> H <sub>29</sub> N <sub>9</sub> O <sub>19</sub><br>Zn <sub>3</sub>  | C <sub>30</sub> H <sub>29</sub> N <sub>9</sub> O <sub>19</sub><br>Zn <sub>3</sub>  | C <sub>30</sub> H <sub>29</sub> N <sub>9</sub> O <sub>19</sub><br>Zn <sub>3</sub>  | C <sub>30</sub> H <sub>29</sub> N <sub>9</sub> O <sub>19</sub><br>Zn <sub>3</sub>  | C <sub>30</sub> H <sub>29</sub> N <sub>9</sub> O <sub>19</sub><br>Zn <sub>3</sub>  |
| Formula weight                                               | 1015.73                                                                            | 1015.73                                                                            | 1029.82                                                                                           | 1029.82                                                                                           | 1015.73                                                                            | 1015.73                                                                            | 1015.73                                                                            | 1015.73                                                                            | 1015.73                                                                            | 1015.73                                                                            |
| Temperature/K                                                | 150.0(10)                                                                          | 293.30(10)                                                                         | 293.00(7)                                                                                         | 150.01(10)                                                                                        | 150.0(10)                                                                          | 150.0(10)                                                                          | 150.0(10)                                                                          | 150.0(10)                                                                          | 150.0(10)                                                                          | 150.0(10)                                                                          |
| Crystal system                                               | hexagonal                                                                          | hexagonal                                                                          | hexagonal                                                                                         | hexagonal                                                                                         | hexagonal                                                                          | hexagonal                                                                          | hexagonal                                                                          | hexagonal                                                                          | hexagonal                                                                          | hexagonal                                                                          |
| Space group                                                  | <i>P6<sub>5</sub></i>                                                              | <i>P6<sub>5</sub></i>                                                              | <i>P6<sub>5</sub></i>                                                                             | <i>P6<sub>5</sub></i>                                                                             | <i>P6<sub>5</sub></i>                                                              | <i>P6<sub>5</sub></i>                                                              | <i>P6<sub>5</sub></i>                                                              | <i>P6<sub>5</sub></i>                                                              | <i>P6<sub>5</sub></i>                                                              | <i>P6<sub>5</sub></i>                                                              |
| <i>a</i> /Å                                                  | 10.1796(2)                                                                         | 10.18518(13)                                                                       | 10.1919(4)                                                                                        | 10.1943(2)                                                                                        | 10.17833(15)                                                                       | 10.17716(19)                                                                       | 10.18058(19)                                                                       | 10.1798(2)                                                                         | 10.17920(17)                                                                       | 10.18156(17)                                                                       |
| <i>b</i> /Å                                                  | 10.1796(2)                                                                         | 10.18518(13)                                                                       | 10.1919(4)                                                                                        | 10.1943(2)                                                                                        | 10.17833(15)                                                                       | 10.17716(19)                                                                       | 10.18058(19)                                                                       | 10.1798(2)                                                                         | 10.17920(17)                                                                       | 10.18156(17)                                                                       |
| <i>c</i> /Å                                                  | 59.8076(12)                                                                        | 60.4220(9)                                                                         | 60.426(2)                                                                                         | 59.8150(11)                                                                                       | 59.8157(17)                                                                        | 59.8005(10)                                                                        | 59.8239(10)                                                                        | 59.8190(12)                                                                        | 59.8323(8)                                                                         | 59.5576(13)                                                                        |
| $\alpha$ /°                                                  | 90                                                                                 | 90                                                                                 | 90                                                                                                | 90                                                                                                | 90                                                                                 | 90                                                                                 | 90                                                                                 | 90                                                                                 | 90                                                                                 | 90                                                                                 |
| $\beta$ /°                                                   | 90                                                                                 | 90                                                                                 | 90                                                                                                | 90                                                                                                | 90                                                                                 | 90                                                                                 | 90                                                                                 | 90                                                                                 | 90                                                                                 | 90                                                                                 |
| $\gamma$ /°                                                  | 120                                                                                | 120                                                                                | 120                                                                                               | 120                                                                                               | 120                                                                                | 120                                                                                | 120                                                                                | 120                                                                                | 120                                                                                | 120                                                                                |
| Volume/Å <sup>3</sup>                                        | 5367.2(2)                                                                          | 5428.29(16)                                                                        | 5435.8(4)                                                                                         | 5383.4(2)                                                                                         | 5366.6(2)                                                                          | 5364.0(2)                                                                          | 5369.7(2)                                                                          | 5368.4(3)                                                                          | 5369.01(19)                                                                        | 5346.8(2)                                                                          |
| <i>Z</i>                                                     | 6                                                                                  | 6                                                                                  | 6                                                                                                 | 6                                                                                                 | 6                                                                                  | 6                                                                                  | 6                                                                                  | 6                                                                                  | 6                                                                                  | 6                                                                                  |
| <i>D</i> <sub>calcd</sub> (g/cm <sup>3</sup> )               | 1.886                                                                              | 1.864                                                                              | 1.888                                                                                             | 1.906                                                                                             | 1.886                                                                              | 1.887                                                                              | 1.885                                                                              | 1.885                                                                              | 1.885                                                                              | 1.893                                                                              |
| F(000)                                                       | 3084.0                                                                             | 3084.0                                                                             | 3084.0                                                                                            | 3084.0                                                                                            | 3084.0                                                                             | 3084.0                                                                             | 3084.0                                                                             | 3084.0                                                                             | 3084.0                                                                             | 3084.0                                                                             |
| Radiation                                                    | CuK $\alpha$ ( $\lambda$ =<br>1.54184 Å)                                           | CuK $\alpha$ ( $\lambda$ =<br>1.54184 Å)                                           | CuK $\alpha$ ( $\lambda$ =<br>1.54184 Å)                                                          | CuK $\alpha$ ( $\lambda$ =<br>1.54184 Å)                                                          | CuK $\alpha$ ( $\lambda$ =<br>1.54184 Å)                                           | CuK $\alpha$ ( $\lambda$ =<br>1.54184 Å)                                           | CuK $\alpha$ ( $\lambda$ =<br>1.54184 Å)                                           | CuK $\alpha$ ( $\lambda$ =<br>1.54184 Å)                                           | CuK $\alpha$ ( $\lambda$ =<br>1.54184 Å)                                           | CuK $\alpha$ ( $\lambda$ =<br>1.54184 Å)                                           |
| Reflections collected                                        | 10409                                                                              | 47429                                                                              | 20246                                                                                             | 27486                                                                                             | 16178                                                                              | 10283                                                                              | 10343                                                                              | 10408                                                                              | 20190                                                                              | 19769                                                                              |
| Independent reflections                                      | 5187 [ <i>R</i> <sub>int</sub> =<br>0.0404, <i>R</i> <sub>sigma</sub> =<br>0.0552] | 7010 [ <i>R</i> <sub>int</sub> =<br>0.0825, <i>R</i> <sub>sigma</sub> =<br>0.0427] | 6243 [ <i>R</i> <sub>int</sub> =<br>0.0553, <i>R</i> <sub>sigma</sub> =<br>0.0623]                | 6758 [ <i>R</i> <sub>int</sub> =<br>0.0616, <i>R</i> <sub>sigma</sub> =<br>0.0494]                | 5609 [ <i>R</i> <sub>int</sub> =<br>0.0365, <i>R</i> <sub>sigma</sub> =<br>0.0362] | 4953 [ <i>R</i> <sub>int</sub> =<br>0.0296, <i>R</i> <sub>sigma</sub> =<br>0.0358] | 5130 [ <i>R</i> <sub>int</sub> =<br>0.0284, <i>R</i> <sub>sigma</sub> =<br>0.0341] | 4739 [ <i>R</i> <sub>int</sub> =<br>0.0275, <i>R</i> <sub>sigma</sub> =<br>0.0337] | 4641 [ <i>R</i> <sub>int</sub> =<br>0.0316, <i>R</i> <sub>sigma</sub> =<br>0.0251] | 5606 [ <i>R</i> <sub>int</sub> =<br>0.0567, <i>R</i> <sub>sigma</sub> =<br>0.0396] |
| Goodness-of-fit on <i>F</i> <sup>2</sup>                     | 1.096                                                                              | 1.089                                                                              | 1.135                                                                                             | 1.184                                                                                             | 1.054                                                                              | 1.058                                                                              | 1.003                                                                              | 1.073                                                                              | 1.170                                                                              | 1.052                                                                              |
| Final <i>R</i> indexes [ <i>I</i> ≥ 2 $\sigma$ ( <i>I</i> )] | <i>R</i> <sub>1</sub> = 0.0402,<br><i>wR</i> <sub>2</sub> = 0.1072                 | <i>R</i> <sub>1</sub> = 0.0580,<br><i>wR</i> <sub>2</sub> = 0.1145                 | <i>R</i> <sub>1</sub> = 0.0938,<br><i>wR</i> <sub>2</sub> = 0.1921                                | <i>R</i> <sub>1</sub> = 0.0808,<br><i>wR</i> <sub>2</sub> = 0.1738                                | <i>R</i> <sub>1</sub> = 0.0280,<br><i>wR</i> <sub>2</sub> = 0.0624                 | <i>R</i> <sub>1</sub> = 0.0337,<br><i>wR</i> <sub>2</sub> = 0.0831                 | <i>R</i> <sub>1</sub> = 0.0288,<br><i>wR</i> <sub>2</sub> = 0.0666                 | <i>R</i> <sub>1</sub> = 0.0372,<br><i>wR</i> <sub>2</sub> = 0.0920                 | <i>R</i> <sub>1</sub> = 0.0377,<br><i>wR</i> <sub>2</sub> = 0.0950                 | <i>R</i> <sub>1</sub> = 0.0572,<br><i>wR</i> <sub>2</sub> = 0.1297                 |
| Final <i>R</i> indexes [all data]                            | <i>R</i> <sub>1</sub> = 0.0452,<br><i>wR</i> <sub>2</sub> = 0.1101                 | <i>R</i> <sub>1</sub> = 0.0603,<br><i>wR</i> <sub>2</sub> = 0.1151                 | <i>R</i> <sub>1</sub> = 0.1006,<br><i>wR</i> <sub>2</sub> = 0.1955                                | <i>R</i> <sub>1</sub> = 0.0864,<br><i>wR</i> <sub>2</sub> = 0.1756                                | <i>R</i> <sub>1</sub> = 0.0297,<br><i>wR</i> <sub>2</sub> = 0.0630                 | <i>R</i> <sub>1</sub> = 0.0343,<br><i>wR</i> <sub>2</sub> = 0.0837                 | <i>R</i> <sub>1</sub> = 0.0311,<br><i>wR</i> <sub>2</sub> = 0.0679                 | <i>R</i> <sub>1</sub> = 0.0381,<br><i>wR</i> <sub>2</sub> = 0.0927                 | <i>R</i> <sub>1</sub> = 0.0389,<br><i>wR</i> <sub>2</sub> = 0.0953                 | <i>R</i> <sub>1</sub> = 0.0586,<br><i>wR</i> <sub>2</sub> = 0.1304                 |
| Largest diff. peak/hole / e Å <sup>-3</sup>                  | 0.55/-0.71                                                                         | 0.83/-0.83                                                                         | 1.16/-1.11                                                                                        | 2.01/-0.98                                                                                        | 0.46/-0.41                                                                         | 0.66/-0.59                                                                         | 0.37/-0.46                                                                         | 0.54/-0.56                                                                         | 0.84/-0.55                                                                         | 0.91/-0.64                                                                         |
| Flack parameter                                              | 0.030(4)                                                                           | 0.02(2)                                                                            | 0.265(10)                                                                                         | 0.039(16)                                                                                         | 0.003(16)                                                                          | 0.00(3)                                                                            | -0.030(19)                                                                         | 0.02(3)                                                                            | -0.03(3)                                                                           | -0.080(19)                                                                         |

$$R1 = \sum(|F_o| - |F_c|) / \sum|F_o|, wR2 = [\sum w(F_o^2 - F_c^2)^2 / \sum w(F_o^2)^2]^{0.5}$$
